# Supplementary material
Source: publisher figshare collection journal article supplement (https://frontiersin.figshare.com/ndownloader/files/28849050)
Supplement: Supplementary file [file 28849050]

**S1 Table.** *Streptococcus* genomes used in the study.

| STRAIN                                 | ACCESSION NUMBER       | TOTAL LENGTH (MB) | PROTEIN COUNT | GC%  | Host          |
|----------------------------------------|------------------------|-------------------|---------------|------|---------------|
| <b>SDSD ATCC 27957</b>                 | NZ_CM001076.1          | 2.14184           | 3972          | 39.4 | Bovine        |
| <b>SDSD DB31752-13</b>                 | NZ_CP033164.1          | 2.31957           | 2026          | 39.3 | Human         |
| <b>SDSD DB49998-05</b>                 | NZ_CP033163.1          | 2.17141           | 1850          | 39.4 | Human         |
| <b>SDSD DB60705-15</b>                 | NZ_CP033165.1          | 2.19066           | 1944          | 39.4 | Human         |
| <b>SDSD DB53993-17</b>                 | INSDC: REF000000000.1  | 2.17042           | 1966          | 39.6 | Human         |
| <b>SDSD Kdys0611</b>                   | NZ_AP018726.1          | 2.22482           | 1961          | 39.9 | Fish          |
| <b>SDSD NCTC13731</b>                  | NZ_UHFH000000000.1     | 2.1517            | 1920          | 39.2 | Bovine        |
| <b>SDSD NCTC4669</b>                   | NZ_LR134094.1          | 2.20189           | 1987          | 39.2 | Bovine        |
| <b>SDSD NCTC4670</b>                   | NZ_UHFG000000000.1     | 2.25218           | 2032          | 39.3 | Bovine        |
| <b>SDSD STREP97-15</b>                 | NZ_CP033166.1          | 2.43257           | 2211          | 39.5 | Fish          |
| <b>SDSE NCTC11554</b>                  | NZ_LR594047.1          | 2.23328           | 2062          | 39.5 | Human         |
| <b>SDSE NCTC5370</b>                   | NZ_LS483318.1          | 2.07995           | 1898          | 39.5 | not available |
| <b>SDSE NCTC5371</b>                   | NZ_LS483367.1          | 2.10376           | 1858          | 39.6 | not available |
| <b>SDSE NCTC6179</b>                   | NZ_LS483361.1          | 2.2552            | 2033          | 39.8 | Horse         |
| <b>SDSE NCTC6181</b>                   | NZ_LR134316.1          | 2.2699            | 2049          | 39.7 | not available |
| <b>SDSE NCTC7136</b>                   | NZ_LS483413.1          | 2.24923           | 2084          | 39.4 | not available |
| <b>SDSE NCTC9413</b>                   | NZ_LR594045.1          | 2.24174           | 2019          | 39.5 | Human         |
| <b>SDSE NCTC9414</b>                   | NZ_LS483363.1          | 2.16967           | 2026          | 39.5 | Human         |
| <b>SDSE 167</b>                        | NZ_AP012976.1          | 2.0764            | 1647          | 39.6 | Human         |
| <b>SDSE AC-2713</b>                    | NZ_HE858529.1          | 2.17944           | 1941          | 39.5 | Human         |
| <b>SDSE ATCC 12394</b>                 | NZ_CP002215.1          | 2.15949           | 1893          | 39.5 | Human         |
| <b>SDSE GGS 124</b>                    | NZ_AP010935.1          | 2.10634           | 1931          | 39.6 | Human         |
| <b>SDSE RE378</b>                      | NZ_AP011114.1          | 2.15115           | 1866          | 39.5 | Human         |
| <b>SD NCTC6403</b>                     | NZ_LR594046.1          | 2.2005            | 1965          | 39.5 | Not available |
| <b>SD NCTC13759</b>                    | INSDC: UHFJ000000000.1 | 2.15094           | 1929          | 38.3 | Not available |
| <b>SD FDAARGOS 654</b>                 | NZ_CP044102.1          | 2.25353           | 2045          | 39.1 | Human         |
| <b>SD SCDR-SD1</b>                     | NZ_CP033391.1          | 2.17914           | 1725          | 41   | Human         |
| <b><i>S. canis</i> B700072</b>         | NZ_LR590625.1          | 2.10661           | 1867          | 39.7 | Not available |
| <b><i>S. canis</i> NCTC12191</b>       | NZ_LR134293.1          | 2.08474           | 1855          | 39.9 | Not available |
| <b><i>S. canis</i> HL_100</b>          | NZ_CP046521.1          | 2.17824           | 1952          | 39.7 | Dog           |
| <b><i>S. pyogenes</i> emm64.3</b>      | NZ_CP035435.1          | 1.77977           | 1693          | 38.6 | Human         |
| <b><i>S. pyogenes</i> emm70</b>        | NZ_CP035448.1          | 1.82647           | 1707          | 38.5 | Human         |
| <b><i>S. pyogenes</i> emm97.1</b>      | NZ_CP035447.1          | 1.81209           | 1677          | 38.4 | Human         |
| <b><i>S. pyogenes</i> FDAARGOS_668</b> | NZ_CP044093.1          | 1.84135           | 1737          | 38.4 | Human         |
| <b><i>S. pyogenes</i> HKU360</b>       | NZ_CP009612.1          | 1.94454           | 1832          | 38.5 | Human         |
| <b><i>S. pyogenes</i> JS12</b>         | NZ_CP021640.1          | 1.81028           | 1632          | 38.5 | Human         |
| <b><i>S. pyogenes</i> NCTC10085</b>    | NZ_LS483401.1          | 1.79527           | 1679          | 38.6 | Human         |
| <b><i>S. pyogenes</i> NCTC12052</b>    | NZ_LS483352.1          | 1.85773           | 1791          | 38.5 | Human         |
| <b><i>S. pyogenes</i> NCTC12696</b>    | NZ_LS483332.1          | 1.84505           | 1777          | 38.5 | Human         |
| <b><i>S. pyogenes</i> NCTC13736</b>    | NZ_LS483414.1          | 1.91321           | 1814          | 38.6 | Human         |
| <b><i>S. pyogenes</i> NCTC13738</b>    | NZ_LS483382.1          | 1.84734           | 1746          | 38.6 | Human         |
| <b><i>S. pyogenes</i> NCTC8322</b>     | NZ_LS483520.1          | 1.82959           | 1746          | 38.5 | Human         |
| <b><i>S. pyogenes</i> SP1336</b>       | NZ_CP031738.1          | 1.87883           | 1736          | 38.5 | Human         |
